# Supplementary material for: Production of a Bioengineered G-Protein Coupled Receptor of Human Formyl Peptide Receptor 3
Source: PLoS One. 2011 Aug 11;6(8):e23076. doi: 10.1371/journal.pone.0023076 (PMC3154916; doi:10.1371/journal.pone.0023076)
Supplement: Table S1 — A list of the detergents screened for optimal solubilization of human FPR3 expressed in HEK293 cells. (DOC) [file pone.0023076.s001.doc]

Supporting Information

**Table S-1 A list of the detergents screened for optimal solubilization of human FPR3 expressed in** HEK293 cells.

| # | Detergent | Type1 | CMC (%)2 | Conc.3 | Spot intensity4 |
| --- | --- | --- | --- | --- | --- |
| 1 | ANAMEG® -7 | N | 0.65 | 2% | 3.30E+06 |
| 2 | ANAPOE®-20 | N | 0.0072 | 2% | 1.05E+06 |
| 3 | ANAPOE®-35 | N | 0.001 | 2% | 1.52E+06 |
| 4 | ANAPOE®-58 | N | 0.00045 | 2% | 4.35E+06 |
| 5 | ANAPOE®-80 | N | 0.0016 | 2% | 453964 |
| 6 | ANAPOE®-C10E6 | N | 0.025 | 2% | 4.58E+06 |
| 7 | ANAPOE®-C10E9 | N | 0.053 | 2% | 5.48E+06 |
| 8 | ANAPOE®-C12E8 | N | 0.0048 | 2% | 4.12 E+06 |
| 9 | ANAPOE®-C12E9 | N | 0.003 | 2% | 3.05 E+06 |
| 10 | ANAPOE®-C12E10 | N | 0.2 | 2% | 3.43 E+06 |
| 11 | ANAPOE®-C13E8 | N | 0.0055 | 2% | 3.63 E+06 |
| 12 | ANAPOE®-X-100 | N | 0.015 | 2% | 6.38 E+06 |
| 13 | ANAPOE®-X-114 | N | 0.011 | 2% | 5.01 E+06 |
| 14 | ANAPOE®-X-305 | N | - | 2% | 754019 |
| 15 | ANAPOE®-X-405 | N | 0.16 | 2% | 637113 |
| 16 | Big CHAP | N | 0.25 | 2% | 1.36 E+06 |
| 17 | Big CHAP, deoxy | N | 0.12 | 2% | 1.18 E+06 |
| 18 | CYGLU®-3 | N | 0.86 | 2% | 1.27 E+06 |
| 19 | CYMAL®-4 | N | 0.37 | 2% | 2.91 E+06 |
| 20 | CYMAL®-5 | N | 0.12 | 2% | 2.61 E+06 |
| 21 | CYMAL®-6 | N | 0.028 | 2% | 2.90 E+06 |
| 22 | CYMAL®-7 | N | 0.0099 | 2% | 2.73 E+06 |
| 23 | 2,6-Dimethyl-4-heptyl--D-maltopyranoside | N | 1.2 | 2% | 1.69 E+06 |
| 24 | 2-Propyl-1-pentyl maltopyranoside | N | 1.9 | 2% | 4.58 E+06 |
| 25 | MEGA-8 | N | 2.5 | 2% | 2.53 E+06 |
| 26 | n-Octyl--D-glucopyranoside | N | 0.53 | 2% | 4.01 E+06 |
| 27 | n-Nonyl--D-glucopyranoside | N | 0.2 | 2% | 3.59 E+06 |
| 28 | n-Octyl--D-maltopyranoside | N | 0.89 | 2% | 2.63 E+06 |
| 29 | n-Nonyl--D-maltopyranoside | N | 0.28 | 2% | 2.48 E+06 |
| 30 | n-Decyl--D-maltopyranoside | N | - | 2% | 2.28 E+06 |
| 31 | n-Decyl--D-maltopyranoside | N | 0.087 | 2% | 2.44 E+06 |
| 32 | n-Undecyl--D-maltopyranoside | N | 0.029 | 2% | 2.29 E+06 |
| 33 | n-Undecyl--D-maltopyranoside | N | 0.029 | 2% | 2.30 E+06 |
| 34 | n-Dodecyl--D-maltopyranoside | N | 0.0076 | 2% | 2.21 E+06 |
| 35 | n-Dodecyl--D-maltopyranoside | N | 0.0087 | 2% | 2.72 E+06 |
| 36 | n-Tridecyl--D-maltopyranoside | N | 0.0017 | 2% | 2.55 E+06 |
| 37 | n-Heptyl--D-thioglucopyranoside | N | 0.85 | 2% | 923303 |
| 38 | n-Octyl--D-thiomaltopyranoside | N | 0.4 | 2% | 4.96 E+06 |
| 39 | n-Nonyl--D-thiomaltopyranoside | N | 0.15 | 2% | 2.59 E+06 |
| 40 | n-Decyl--D-thiomaltopyranoside | N | 0.045 | 2% | 2.27 E+06 |
| 41 | n-Undecyl--D-thiomaltopyranoside | N | 0.011 | 2% | 2.63 E+06 |
| 42 | n-Dodecyl--D-thiomaltopyranoside | N | 0.0026 | 2% | 2.28 E+06 |
| 43 | Hexaethylene glycol monooctyl ether (C8E6) | N | 0.39 | 2% | 2.27 E+06 |
| 44 | Octaethylene glycol monododecyl ether (C12E8) | N | 0.0048 | 2% | 1.99 E+06 |
| 45 | Pentaethylene glycol monodecyl ether (C10E5) | N | 0.031 | 2% | 2.48 E+06 |
| 46 | Tetraethylene glycol monooctyl ether (C8E4) | N | 0.25 | 2% | 3.59 E+06 |
| 47 | Sucrose monododecanoate | N | 0.016 | 2% | 3.85 E+06 |
| 48 | Dimethyldecylphosphine oxide | N | 0.1 | 2% | 2.31 E+06 |
| 49 | HEGA-10 | N | 0.26 | 2% | 577341 |
| 50 | NP-40 | N | 0.05-0.3 | 2% | 553933 |
| 51 | Digitonin | N | - | 2% | 1.58 E+06 |
| 52 | Deoxycholic acid, sodium salt | A | 0.24 | 2% | 1.37 E+06 |
| 53 | Sodium cholate | A | 0.41 | 2% | 5.24 E+06 |
| 54 | FOS-MEA®-8 | A | 0.59 | 2% | 3.96 E+06 |
| 55 | FOS-MEA®-10 | A | 0.15 | 2% | 3.85 E+06 |
| 56 | Sodium dodecanoyl sarcosine | A | 0.42 | 2% | 1.34 E+06 |
| 57 | Decyltrimethylammonium chloride | C | 0.07 | 2% | 362654 |
| 58 | Dodecyltrimethylammonium chloride | C | 0.0012 | 2% | 437111 |
| 59 | Hexadecyltrimethylammonium chloride | C | 0.000102 | 2% | 954116 |
| 60 | Tetradecyltrimethylammonium chloride | C | 0.0009 | 2% | 1.25 E+06 |
| 61 | ANZERGENT® 3-10 | Z | 1.2 | 2% | 4.14 E+06 |
| 62 | ANZERGENT® 3-12 | Z | 0.094 | 2% | 3.60 E+06 |
| 63 | ANZERGENT® 3-14 | Z | 0.007 | 2% | 2.91 E+06 |
| 64 | CHAPS | Z | 0.49 | 2% | 3.08 E+06 |
| 65 | CHAPSO | Z | 0.5 | 2% | 2.96 E+06 |
| 66 | C-DODECAFOS™ | Z | 0.77 | 2% | 5.32 E+06 |
| 67 | CYCLOFOS™-4 | Z | 0.45 | 2% | 3.24 E+06 |
| 68 | CYCLOFOS™-5 | Z | 0.15 | 2% | 4.39 E+06 |
| 69 | CYCLOFOS™-6 | Z | 0.094 | 2% | 3.92 E+06 |
| 70 | CYCLOFOS™-7 | Z | 0.022 | 2% | 4.98 E+06 |
| 71 | FOS-CHOLINE®-9 | Z | 1.2 | 2% | 2.99 E+06 |
| 72 | FOS-CHOLINE®-10 | Z | 0.35 | 2% | 3.89 E+06 |
| 73 | FOS-CHOLINE®-11 | Z | 0.062 | 2% | 4.25 E+06 |
| 74 | FOS-CHOLINE®-12 | Z | 0.047 | 2% | 5.51 E+06 |
| 75 | FOS-CHOLINE®-13 | Z | 0.027 | 2% | 5.57 E+06 |
| 76 | FOS-CHOLINE®-14 | Z | 0.0046 | 2% | 5.77 E+06 |
| 77 | FOS-CHOLINE®-15 | Z | 0.0027 | 2% | 5.54 E+06 |
| 78 | FOS-CHOLINE®-16 | Z | 0.00053 | 2% | 4.25 E+06 |
| 79 | FOS-CHOLINE®-ISO-9 | Z | 0.99 | 2% | 721324 |
| 80 | FOS-CHOLINE®-ISO-11 | Z | 0.9 | 2% | 1.93 E+06 |
| 81 | FOS-CHOLINE®-ISO-11-6U | Z | 0.87 | 2% | 599655 |
| 82 | FOS-CHOLINE®-UNSAT-11-10 | Z | 0.21 | 2% | 7.65 E+06 |
| 83 | FOSFEN™-9 | Z | 0.014 | 2% | 3.41 E+06 |
| 84 | NOPOL-FOS™ | Z | 1.4 | 2% | 1.85 E+06 |
| 85 | PMAL™-C8 | Z | - | 2% | 3.16 E+06 |
| 86 | PMAL™-C10 | Z | - | 2% | 1.17 E+06 |
| 87 | n-Decyl-N,N-dimethylglycine | Z | 0.46 | 2% | 1.97 E+06 |
| 88 | n-Dodecyl-N,N-dimethylglycine | Z | 0.041 | 2% | 2.43 E+06 |
| 89 | n-Dodecyl--iminodipropionic acid,monosodium salt | Z | - | 2% | 2.94 E+06 |
| 90 | n-Tetradecyl-N,N-dimethylamine-N-oxide (TDAO) | Z | 0.0075 | 2% | 3.59 E+06 |
| 91 | n-Dodecyl-N,N-dimethylamine-N-oxide (DDAO) | Z | 0.0023 | 2% | 3.73 E+06 |
| 92 | Digitonin (8%) + Cholate (2%) | M |  |  | 3.12 E+06 |
| 93 | CHAPS (6%) + CHS (1.2%) + DDM (10%) | M |  |  | 3.94 E+06 |
| 94 | CHAPS (10%) + CHS (2%) + DDM (2%) | M |  |  | 3.64 E+06 |
| 95 | CHAPS (10%) + CHS (2%) | M |  |  | 3.45 E+06 |
| 96 | CHAPS (10%) + OG (1%) | M |  |  | 5.15 E+06 |

1. Detergent type: N (non-ionic detergent), A (anionic detergent), C (cationic detergent), Z (zwitter-ionic detergent) and M (detergent mixture);

2. CMC (critical micelle concentration) in H2O from www.anatrace.com.

3. Concentration of detergents used during the detergent screen.

4. The intensity of each dot quantified by spot densitometry after Dot blot analysis against rho1D4 tag.
